# Supplementary material for: Assembly of non-crystalline cobalt particles into crystalline tricobalt tetroxide nanowires under an external magnetic field
Source: Royal Society of Chemistry journal article supplement (doi:10.1039/c000439a), 2010-01-01
Supplement: c000439a.pdf [file c000439a.pdf]

**Supporting Information:**

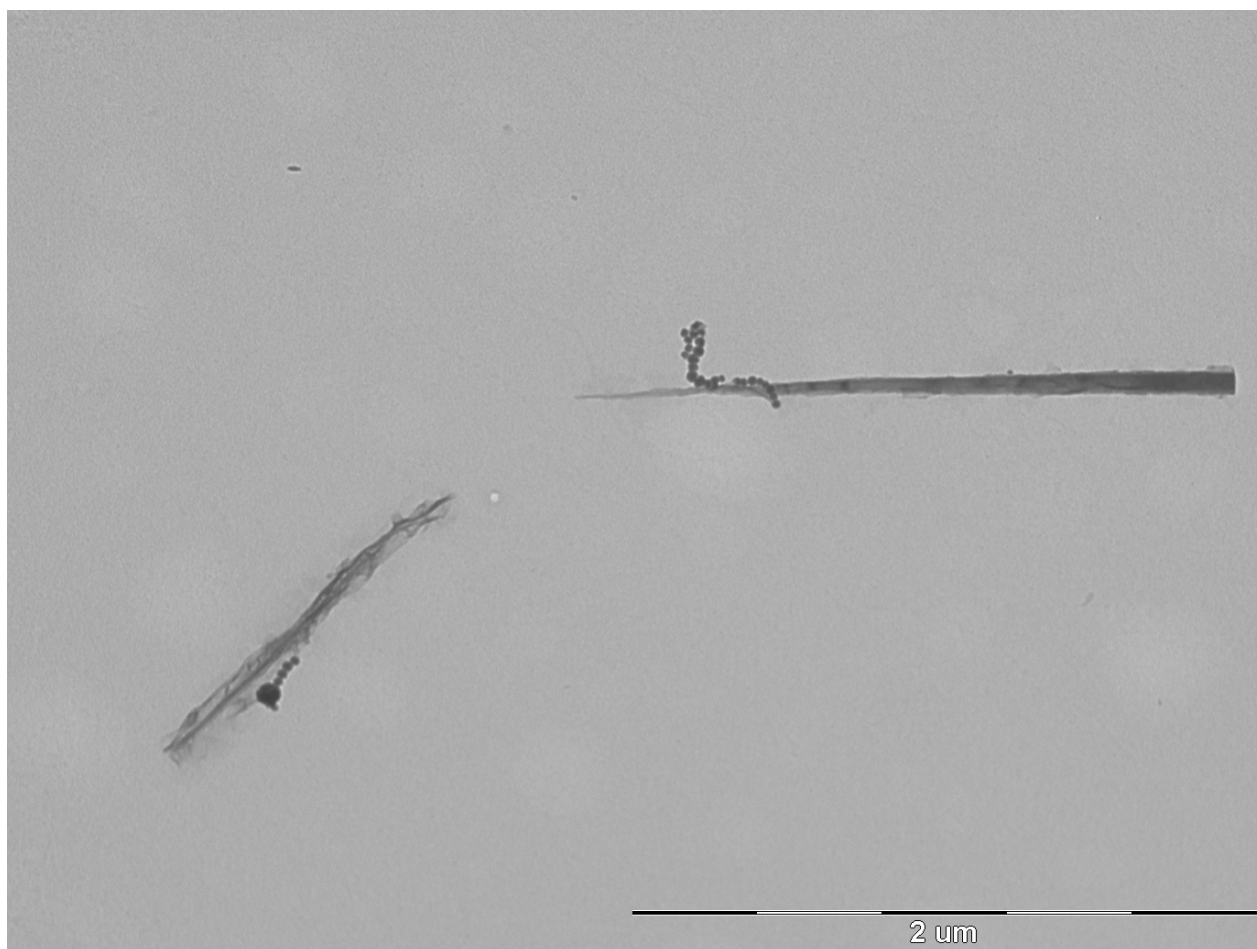

Figure S1: TEM image of the nanowires formed in Step V shown in Fig.5.

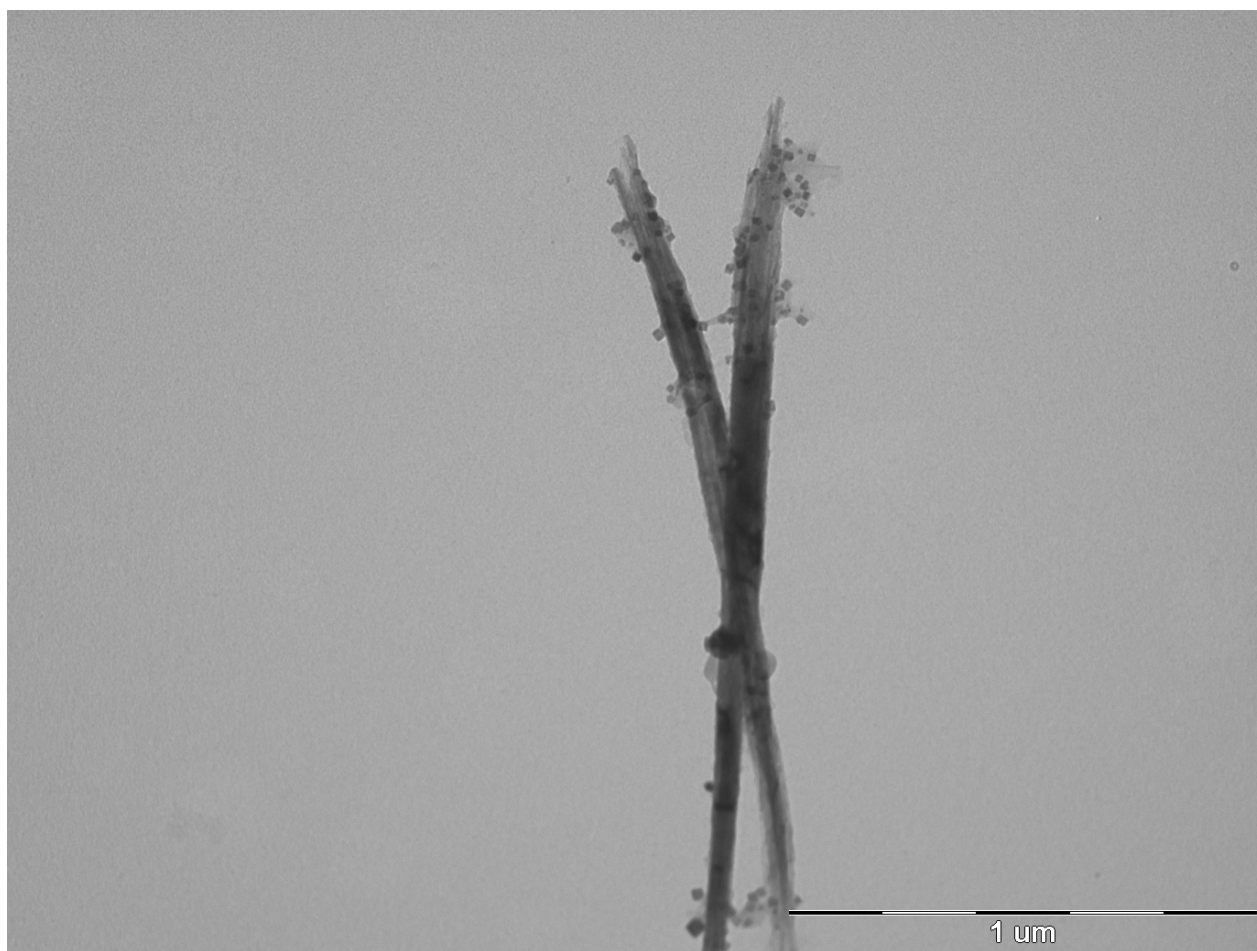

Figure S2: A TEM image shows the formation of  $\text{Co}_3\text{O}_4$  nanowires.

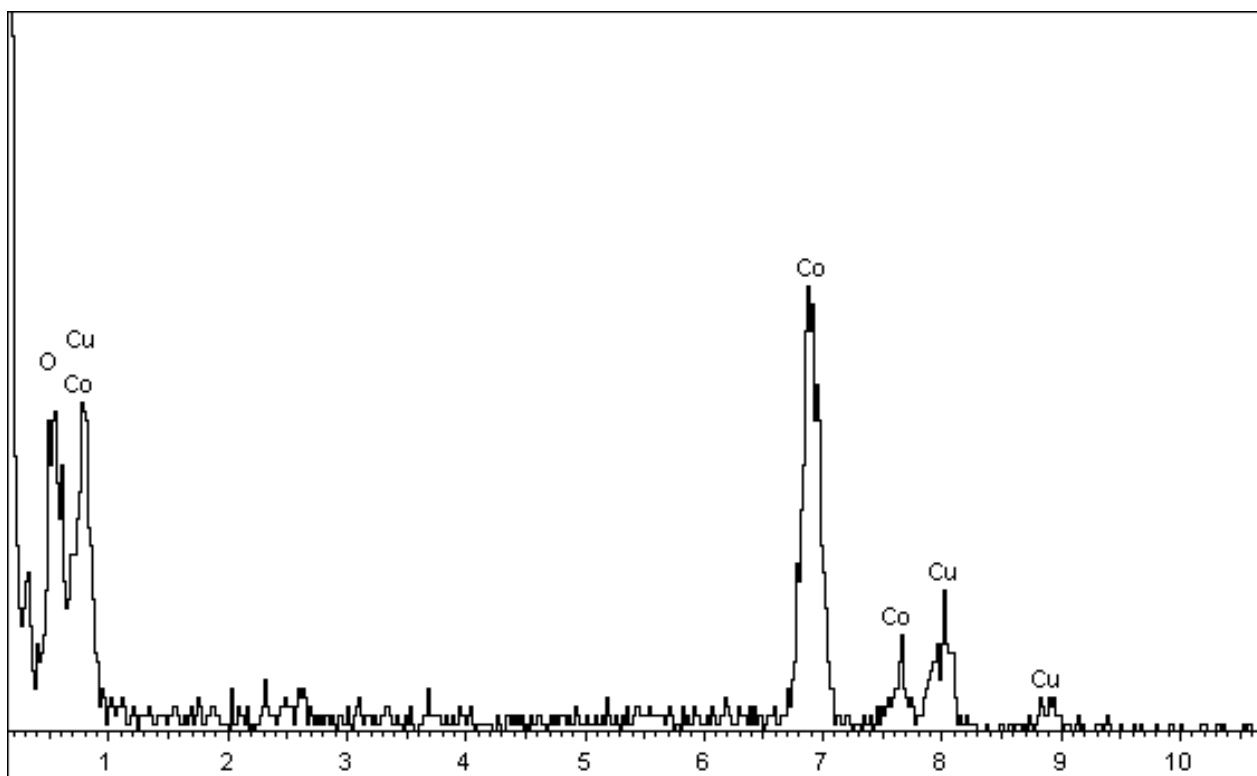

Figure S3: X-ray energy dispersive (EDS) microanalysis of the nanowires

X-ray energy dispersive (EDS) microanalysis of the nanowires was shown. The corresponding peaks of O, Co elements appear in EDS spectrum, confirming that the products are composed of  $\text{Co}_3\text{O}_4$ .
